# Supplementary material for: Development of essential oil diffusion matrices using non-ionic surfactants-supported NADES and hydrophobic NADES
Source: Royal Society of Chemistry journal article supplement (doi:10.1039/d4an01161a), 2024-12-09
Supplement: d4an01161a1.pdf [file d4an01161a1.pdf]

## **Development of essential oil diffusion matrices using non-ionic surfactants-supported NADES and hydrophobic NADES**

Samir Scandar<sup>1,2</sup>, Natali Rianika Mustafa<sup>2</sup>, Claudia Zadra<sup>1</sup>, Maria Carla Marcotullio<sup>1,\*</sup> and Young Hae Choi<sup>2,\*</sup>

<sup>1</sup> Department of Pharmaceutical Sciences, Via del Giochetto, Ed. B, University of Perugia, 06122 Perugia, Italy

<sup>2</sup> Natural Products Laboratory, Institute of Biology Leiden, Leiden University, 2333 BE Leiden, The Netherlands

\* Corresponding Authors: [mariacarla.marcotullio@unipg.it](mailto:mariacarla.marcotullio@unipg.it), [y.choi@chem.leidenuniv.nl](mailto:y.choi@chem.leidenuniv.nl),

**Table S1.** Screening test conducted to identify the optimal HLB ratio for hydrophilic NADES formulations, N3 based on various Tween20:Span 80 HLB values.

|                 |                 |                     |                |                |                |                |                |  |
|-----------------|-----------------|---------------------|----------------|----------------|----------------|----------------|----------------|--|
| <b>Tween 20</b> | <b>Tween 80</b> | <b>Triton X 100</b> | <b>PEG 400</b> | <b>PEG 200</b> | <b>Span 80</b> | <b>Span 20</b> | <b>Span 65</b> |  |
| <b>16.7</b>     | <b>15</b>       | <b>13.4</b>         | <b>9.7</b>     | <b>8</b>       | <b>4.3</b>     | <b>8.6</b>     | <b>2.1</b>     |  |

| NADES 3 – N3 |       |           |            |    |       |       |       |       |       |       |       |
|--------------|-------|-----------|------------|----|-------|-------|-------|-------|-------|-------|-------|
|              | Range | % Span 80 | % Tween 20 | T0 | Day 1 | Day 2 | Day 3 | Day 4 | Day 5 | Day 6 | Day 7 |
| 1            | 4.3   | 3000      | 0          |    |       |       |       |       |       |       |       |
| 2            | 5     | 2831      | 169        |    |       |       |       |       |       |       |       |
| 3            | 6     | 2589      | 411        |    |       |       |       |       |       |       |       |
| 4            | 7     | 2347      | 653        |    |       |       |       |       |       |       |       |
| 5            | 8     | 2105      | 895        |    |       |       |       |       |       |       |       |
| 6            | 9     | 1863      | 1137       |    |       |       |       |       |       |       |       |
| 7            | 10    | 1621      | 1379       |    |       |       |       |       |       |       |       |
| 8            | 11    | 1379      | 1621       |    |       |       |       |       |       |       |       |
| 9            | 12    | 1137      | 1863       |    |       |       |       |       |       |       |       |
| 10           | 13    | 895       | 2105       |    |       |       |       |       |       |       |       |
| 11           | 14    | 653       | 2347       |    |       |       |       |       |       |       |       |
| 12           | 15    | 411       | 2589       |    |       |       |       |       |       |       |       |
| 13           | 16    | 169       | 2831       |    |       |       |       |       |       |       |       |
| 14           | 16.7  | 0         | 3000       |    |       |       |       |       |       |       |       |

Colors of the cells indicate the % of phase separation:

|               |                |                |                |                 |                                                  |
|---------------|----------------|----------------|----------------|-----------------|--------------------------------------------------|
| 0% separation | 30% separation | 60% separation | 90% separation | 100% separation | Heat: MW irradiation 600W; *Clear: see Figure S2 |
|---------------|----------------|----------------|----------------|-----------------|--------------------------------------------------|

**Table S2.** Screening test conducted to identify the optimal HLB ratio for hydrophilic NADES formulations, N5 based on various Tween20:Span 80 HLB values.

|                 |                 |                     |                |                |                |                |                |  |
|-----------------|-----------------|---------------------|----------------|----------------|----------------|----------------|----------------|--|
| <b>Tween 20</b> | <b>Tween 80</b> | <b>Triton X 100</b> | <b>PEG 400</b> | <b>PEG 200</b> | <b>Span 80</b> | <b>Span 20</b> | <b>Span 65</b> |  |
| <b>16.7</b>     | <b>15</b>       | <b>13.4</b>         | <b>9.7</b>     | <b>8</b>       | <b>4.3</b>     | <b>8.6</b>     | <b>2.1</b>     |  |

| NADES 5 – N5 |       |           |            |        |       |       |       |       |       |       |       |
|--------------|-------|-----------|------------|--------|-------|-------|-------|-------|-------|-------|-------|
|              | Range | % Span 80 | % Tween 20 | T0     | Day 1 | Day 2 | Day 3 | Day 4 | Day 5 | Day 6 | Day 7 |
| 1            | 4.3   | 3000      | 0          | + heat |       |       |       |       |       |       |       |
| 2            | 5     | 2831      | 169        | + heat | Clear |       |       |       |       |       |       |
| 3            | 6     | 2589      | 411        | + heat | Clear |       |       |       |       |       |       |
| 4            | 7     | 2347      | 653        | + heat | Clear |
| 5            | 8     | 2105      | 895        | + heat | Clear |
| 6            | 9     | 1863      | 1137       | + heat | Clear |
| 7            | 10    | 1621      | 1379       | + heat | Clear |
| 8            | 11    | 1379      | 1621       | + heat | Clear |
| 9            | 12    | 1137      | 1863       | + heat | Clear |
| 10           | 13    | 895       | 2105       | + heat | Clear |
| 11           | 14    | 653       | 2347       | + heat | Clear |
| 12           | 15    | 411       | 2589       | + heat | Clear |
| 13           | 16    | 169       | 2831       | + heat |       |       |       |       |       |       |       |
| 14           | 16.7  | 0         | 3000       | + heat | Clear |

Colors of the cells indicate the % of phase separation:

|                                                                                    |               |                                                                                    |                |                                                                                    |                |                                                                                    |                |                                                                                      |                 |                                                  |
|------------------------------------------------------------------------------------|---------------|------------------------------------------------------------------------------------|----------------|------------------------------------------------------------------------------------|----------------|------------------------------------------------------------------------------------|----------------|--------------------------------------------------------------------------------------|-----------------|--------------------------------------------------|
|  | 0% separation |  | 30% separation |  | 60% separation |  | 90% separation |  | 100% separation | Heat: MW irradiation 600W; *Clear: see Figure S2 |
|------------------------------------------------------------------------------------|---------------|------------------------------------------------------------------------------------|----------------|------------------------------------------------------------------------------------|----------------|------------------------------------------------------------------------------------|----------------|--------------------------------------------------------------------------------------|-----------------|--------------------------------------------------|

**Table S3.** Screening test conducted to identify the optimal HLB ratio for hydrophilic NADES formulations, N1 based on various Tween20:Span 80 HLB values.

|                 |                 |                     |                |                |                |                |                |
|-----------------|-----------------|---------------------|----------------|----------------|----------------|----------------|----------------|
| <b>Tween 20</b> | <b>Tween 80</b> | <b>Triton X 100</b> | <b>PEG 400</b> | <b>PEG 200</b> | <b>Span 80</b> | <b>Span 20</b> | <b>Span 65</b> |
| <b>16.7</b>     | <b>15</b>       | <b>13.4</b>         | <b>9.7</b>     | <b>8</b>       | <b>4.3</b>     | <b>8.6</b>     | <b>2.1</b>     |

| NADES 1 – N1 |       |           |            |       |       |       |       |       |       |       |       |
|--------------|-------|-----------|------------|-------|-------|-------|-------|-------|-------|-------|-------|
|              | Range | % Span 80 | % Tween 20 | T0    | Day 1 | Day 2 | Day 3 | Day 4 | Day 5 | Day 6 | Day 7 |
| 1            | 4.3   | 3000      | 0          | +heat |       |       |       |       |       |       |       |
| 2            | 5     | 2831      | 169        | +heat |       |       |       |       |       |       |       |
| 3            | 6     | 2589      | 411        | +heat |       |       |       |       |       |       |       |
| 4            | 7     | 2347      | 653        | +heat |       |       |       |       |       |       |       |
| 5            | 8     | 2105      | 895        | +heat |       |       |       |       |       |       |       |
| 6            | 9     | 1863      | 1137       | +heat |       |       |       |       |       |       |       |
| 7            | 10    | 1621      | 1379       | +heat |       |       |       |       |       |       |       |
| 8            | 11    | 1379      | 1621       | +heat |       |       |       |       |       |       |       |
| 9            | 12    | 1137      | 1863       | +heat |       |       |       |       |       |       |       |
| 10           | 13    | 895       | 2105       | +heat | Clear |
| 11           | 14    | 653       | 2347       | +heat | Clear |
| 12           | 15    | 411       | 2589       | +heat | Clear |
| 13           | 16    | 169       | 2831       | +heat | Clear |
| 14           | 16.7  | 0         | 3000       | +heat | Clear |

Colors of the cells indicate the % of phase separation:

|                                                                                    |               |                                                                                    |                |                                                                                    |                |                                                                                    |                |                                                                                      |                 |                                                  |
|------------------------------------------------------------------------------------|---------------|------------------------------------------------------------------------------------|----------------|------------------------------------------------------------------------------------|----------------|------------------------------------------------------------------------------------|----------------|--------------------------------------------------------------------------------------|-----------------|--------------------------------------------------|
|  | 0% separation |  | 30% separation |  | 60% separation |  | 90% separation |  | 100% separation | Heat: MW irradiation 600W; *Clear: see Figure S2 |
|------------------------------------------------------------------------------------|---------------|------------------------------------------------------------------------------------|----------------|------------------------------------------------------------------------------------|----------------|------------------------------------------------------------------------------------|----------------|--------------------------------------------------------------------------------------|-----------------|--------------------------------------------------|

**Table S4.** 21 Volatile headspace compounds (mean peak area  $\pm$  SD) of *Lavandula angustifolia* extracted by headspace and analyzed by GCMS at various incubation times of 0.0, 0.5, 1.0, 4.0, 24.0, 48.0, 72.0, and 96.0 hours for control (C) samples.

| Compounds                  | T 0.0<br>mean | $\pm$ SD | T 0.5<br>mean | $\pm$ SD | T 1.0<br>mean | $\pm$ SD | T 4.0<br>mean | $\pm$ SD | T 24.0<br>mean | $\pm$ SD | T 48.0<br>mean | $\pm$ SD | T 72.0<br>mean | $\pm$ SD | T 96.0<br>mean | $\pm$ SD |
|----------------------------|---------------|----------|---------------|----------|---------------|----------|---------------|----------|----------------|----------|----------------|----------|----------------|----------|----------------|----------|
| $\alpha$ -thujene          | 1729.33       | 25.42    | 3607.00       | 102.09   | 3318.33       | 60.50    | 3607.67       | 46.70    | 2065.33        | 706.09   | 2864.25        | 208.60   | 2912.75        | 44.67    | 3361.75        | 44.67    |
| $\alpha$ -phellandrene     | 16767.33      | 8785.43  | 25878.67      | 3715.53  | 22946.00      | 4623.80  | 22177.67      | 42.03    | 15834.67       | 6241.22  | 15030.00       | 6509.84  | 16969.50       | 1463.03  | 25016.25       | 1463.03  |
| $\alpha$ -pinene           | 29654.67      | 12522.75 | 42489.33      | 363.36   | 41608.67      | 2099.84  | 44469.00      | 271.18   | 34082.33       | 7187.53  | 22457.00       | 17204.77 | 36270.75       | 2783.36  | 40039.00       | 2783.36  |
| camphene                   | 13893.00      | 3433.38  | 16977.33      | 2299.86  | 18195.00      | 901.63   | 19014.33      | 406.04   | 15057.00       | 2808.65  | 14512.75       | 5177.32  | 16292.75       | 1618.32  | 18257.75       | 1618.32  |
| $\beta$ -thujene           | 3093.67       | 1026.95  | 3824.67       | 85.78    | 3982.00       | 166.96   | 3717.67       | 118.80   | 2976.00        | 414.35   | 2951.25        | 833.84   | 3312.25        | 242.47   | 3445.50        | 242.47   |
| $\beta$ -pinene            | 12290.67      | 1030.05  | 23212.00      | 1574.22  | 23918.00      | 998.98   | 25822.67      | 916.64   | 21860.00       | 3759.27  | 20448.00       | 4754.66  | 20821.50       | 1873.83  | 4533.00        | 1873.83  |
| 3-octanone                 | 11378.00      | 4856.68  | 17669.67      | 1280.17  | 17654.33      | 1034.84  | 20026.33      | 377.50   | 14728.67       | 3422.70  | 14733.50       | 2722.03  | 15066.00       | 862.42   | 15842.50       | 862.42   |
| $\beta$ -myrcene           | 15576.00      | 6631.79  | 23212.00      | 1574.22  | 23822.00      | 960.93   | 25754.00      | 1088.81  | 21652.00       | 3577.86  | 20447.25       | 4754.96  | 20505.25       | 1687.05  | 19722.25       | 1687.05  |
| 3-carene                   | 8930.00       | 3612.29  | 13411.33      | 370.17   | 13752.33      | 1090.96  | 14583.67      | 530.41   | 9777.00        | 7538.98  | 14733.50       | 2722.03  | 9930.00        | 446.76   | 9321.50        | 446.76   |
| $\beta$ -cymene            | 0.00          | 0.00     | 0.00          | 0.00     | 0.00          | 0.00     | 0.00          | 0.00     | 0.00           | 0.00     | 0.00           | 0.00     | 0.00           | 0.00     | 3713.50        | 112.98   |
| o-cymene                   | 3683.33       | 1417.83  | 5677.33       | 513.75   | 5370.67       | 316.11   | 5807.00       | 289.68   | 3965.00        | 524.13   | 4166.75        | 940.46   | 5462.25        | 915.21   | 7220.75        | 915.21   |
| d-limonene                 | 4412.00       | 543.04   | 8663.00       | 229.42   | 8693.33       | 348.01   | 9358.00       | 99.51    | 7772.33        | 1013.55  | 7541.25        | 1117.65  | 7716.00        | 861.50   | 8169.25        | 861.50   |
| eucalyptol                 | 6727.67       | 136.39   | 10065.67      | 1229.74  | 13088.33      | 404.54   | 13458.33      | 115.85   | 9355.33        | 1182.79  | 8897.00        | 1206.71  | 9746.75        | 1339.72  | 10833.50       | 1339.72  |
| trans- $\beta$ -ocimene    | 83890.00      | 37919.77 | 123822.00     | 128.18   | 131514.67     | 1444.57  | 141542.00     | 1953.95  | 113718.33      | 163.93   | 97403.00       | 183.28   | 92818.50       | 342.27   | 42411.00       | 342.27   |
| $\beta$ -ocimene           | 27671.33      | 11012.60 | 41246.67      | 1984.84  | 42678.00      | 1453.04  | 44974.67      | 1163.36  | 45535.67       | 7011.76  | 29918.25       | 18630.05 | 29669.25       | 4842.03  | 5831.25        | 4842.03  |
| Linalool                   | 27711.67      | 14283.06 | 42462.33      | 437.26   | 48937.67      | 2013.17  | 51444.33      | 4970.95  | 46277.00       | 3331.40  | 46522.00       | 3821.80  | 43212.50       | 4146.12  | 43135.75       | 4146.12  |
| trans-2-pinanol            | 0.00          | 0.00     | 2241.67       | 62.55    | 2472.67       | 102.51   | 2672.33       | 151.85   | 2184.33        | 311.37   | 2327.25        | 498.95   | 2048.00        | 271.89   | 2375.75        | 271.89   |
| (+)-camphor                | 0.00          | 0.00     | 0.00          | 0.00     | 0.00          | 0.00     | 0.00          | 0.00     | 0.00           | 0.00     | 845.50         | 22.72    | 886.25         | 118.98   | 1095.50        | 118.98   |
| (-)-4-terpineol            | 3538.33       | 2658.12  | 6335.67       | 628.45   | 7366.33       | 1182.48  | 6753.00       | 1165.03  | 6711.67        | 913.30   | 7569.75        | 740.79   | 6160.75        | 1429.16  | 5106.75        | 1429.16  |
| linalyl acetate            | 11085.00      | 578.09   | 30464.33      | 2048.70  | 33356.33      | 1640.60  | 35130.00      | 4868.80  | 32609.33       | 2951.13  | 32613.75       | 1039.43  | 29184.75       | 4535.55  | 13035.00       | 4535.55  |
| (Z,Z)- $\alpha$ -farnesene | 0.00          | 0.00     | 0.00          | 0.00     | 730.33        | 40.43    | 353.33        | 22.59    | 953.00         | 192.32   | 969.75         | 211.32   | 608.00         | 232.26   | 769.00         | 232.26   |

**Table S5.** 22 Volatile headspace compounds (mean peak area  $\pm$  SD) of *Lavandula angustifolia* extracted by headspace and analyzed by GCMS at various incubation times of 0.0, 0.5, 1.0, 4.0, 24.0, 48.0, 72.0, and 96.0 hours for N1 samples

| Compounds                  | T 0.0<br>mean | $\pm$ SD | T 0.5<br>mean | $\pm$ SD | T 1.0 mean | $\pm$ SD | T 4.0 mean | $\pm$ SD | T 24.0<br>mean | $\pm$ SD | T 48.0<br>mean | $\pm$ SD | T 72.0<br>mean | $\pm$ SD | T 96.0<br>mean | $\pm$ SD |
|----------------------------|---------------|----------|---------------|----------|------------|----------|------------|----------|----------------|----------|----------------|----------|----------------|----------|----------------|----------|
| $\alpha$ -thujene          | 0.0           | 0.0      | 0.0           | 0.0      | 0.0        | 0.0      | 487.2      | 67.3     | 1440.3         | 155.9    | 1698.0         | 114.3    | 1769.0         | 175.6    | 2321.5         | 234.8    |
| $\alpha$ -phellandrene     | 164.4         | 19.7     | 160.8         | 37.7     | 476.0      | 69.8     | 4187.2     | 78.7     | 9912.3         | 166.2    | 11207.0        | 431.3    | 12642.7        | 125.9    | 11606.0        | 378.3    |
| $\alpha$ -pinene           | 441.6         | 43.1     | 677.6         | 69.5     | 1428.8     | 18.6     | 9502.2     | 475.9    | 18757.7        | 1067.7   | 20935.3        | 1156.9   | 22813.0        | 362.7    | 23546.0        | 111.0    |
| camphene                   | 413.4         | 24.3     | 535.8         | 36.7     | 1635.0     | 35.8     | 7396.0     | 380.4    | 6861.3         | 527.4    | 7339.8         | 388.2    | 7442.7         | 239.0    | 7479.5         | 194.5    |
| $\beta$ -phellandrene      | 0.0           | 0.0      | 0.0           | 0.0      | 0.0        | 0.0      | 1832.8     | 205.4    | 2246.8         | 45.9     | 2594.0         | 93.4     | 2183.7         | 198.3    | 1772.8         | 32.3     |
| $\beta$ -pinene            | 0.0           | 0.0      | 0.0           | 0.0      | 0.0        | 0.0      | 3068.0     | 43.3     | 4313.8         | 210.1    | 3972.3         | 122.2    | 3814.3         | 382.0    | 3742.0         | 60.1     |
| 3-octanone                 | 0.0           | 0.0      | 0.0           | 0.0      | 9489.2     | 56.2     | 13773.6    | 220.1    | 15740.8        | 488.9    | 16883.5        | 272.9    | 14454.0        | 368.9    | 11564.0        | 111.7    |
| $\beta$ -myrcene           | 0.0           | 0.0      | 0.0           | 0.0      | 0.0        | 0.0      | 11040.4    | 260.1    | 12588.9        | 123.1    | 14583.5        | 237.6    | 13340.5        | 227.0    | 12401.0        | 146.7    |
| 3-carene                   | 499.2         | 62.2     | 808.0         | 94.1     | 2267.2     | 27.5     | 6893.0     | 395.5    | 8158.0         | 214.7    | 8769.0         | 187.7    | 8115.0         | 35.4     | 7341.0         | 26.4     |
| hexylacetate               | 0.0           | 0.0      | 0.0           | 0.0      | 1651.0     | 51.5     | 6624.4     | 62.6     | 5838.8         | 727.9    | 6231.8         | 482.1    | 4714.0         | 635.6    | 4377.0         | 412.0    |
| o-cymene                   | 0.0           | 0.0      | 0.0           | 0.0      | 7759.6     | 14.4     | 16542.6    | 102.6    | 17203.8        | 1849.7   | 18614.0        | 562.1    | 18103.0        | 1400.0   | 18967.3        | 698.6    |
| d-limonene                 | 0.0           | 0.0      | 0.0           | 0.0      | 0.0        | 0.0      | 5440.4     | 227.0    | 6017.3         | 505.7    | 6732.3         | 103.9    | 5832.7         | 5.7      | 5536.0         | 96.2     |
| eucalyptol                 | 2245.0        | 35.2     | 4229.0        | 21.2     | 8513.4     | 21.4     | 11614.2    | 571.1    | 13679.8        | 664.6    | 15455.3        | 847.4    | 13342.0        | 1868.5   | 11709.5        | 4.9      |
| trans- $\beta$ -ocimene    | 9360.8        | 284.4    | 10442.8       | 384.0    | 25665.2    | 0.0      | 85786.0    | 1033.8   | 97151.5        | 3087.2   | 90941.0        | 3360.2   | 69638.0        | 608.1    | 56644.5        | 281.3    |
| $\beta$ -ocimene           | 6048.2        | 54.2     | 8953.4        | 14.1     | 9221.6     | 65.2     | 16113.4    | 1265.1   | 37426.5        | 519.6    | 38413.0        | 522.1    | 28894.0        | 2256.6   | 19718.8        | 272.2    |
| $\gamma$ -terpinene        | 0.0           | 0.0      | 0.0           | 0.0      | 2136.4     | 524.0    | 4522.0     | 1010.5   | 4026.5         | 236.0    | 3917.5         | 416.5    | 2559.3         | 218.5    | 1805.0         | 11.3     |
| linalool                   | 24447.0       | 165.7    | 27491.6       | 1858.4   | 40364.4    | 1434.9   | 41608.4    | 135.8    | 46421.8        | 1934.9   | 48336.0        | 410.0    | 37998.3        | 691.1    | 28883.5        | 74.2     |
| (+)-camphor                | 712.8         | 111.5    | 1366.0        | 196.4    | 1336.4     | 177.7    | 1445.2     | 213.9    | 1727.6         | 418.0    | 3869.8         | 2624.0   | 3446.3         | 3526.5   | 2945.2         | 270.3    |
| (-)-4-terpineol            | 3847.8        | 35.9     | 4676.6        | 153.5    | 5521.6     | 222.6    | 8055.4     | 570.8    | 5497.8         | 310.6    | 3067.8         | 36.2     | 2653.0         | 14.4     | 1930.3         | 4.2      |
| linalyl acetate            | 23300.2       | 506.9    | 25989.2       | 817.9    | 37098.4    | 549.7    | 43265.0    | 963.9    | 40494.8        | 346.2    | 37454.3        | 132.2    | 28445.3        | 287.0    | 27575.5        | 135.1    |
| trifluoroacetyl-lavandulol | 0.0           | 0.0      | 0.0           | 0.0      | 0.0        | 0.0      | 0.0        | 0.0      | 2666.5         | 199.7    | 3533.3         | 729.4    | 2580.0         | 98.0     | 3114.8         | 389.6    |
| (Z,Z)- $\alpha$ -farnesene | 478.4         | 86.8     | 472.8         | 60.0     | 373.0      | 93.4     | 659.2      | 337.1    | 602.3          | 183.0    | 566.5          | 50.4     | 497.0          | 39.9     | 457.0          | 180.8    |



**Table S7.** 18 Volatile headspace compounds (mean peak area  $\pm$  SD) of *Lavandula angustifolia* extracted by headspace and analyzed by GCMS at various incubation times of 0.0, 0.5, 1.0, 4.0, 24.0, 48.0, 72.0, and 96.0 hours for N5 samples.

| Compounds                  | T 0.0<br>mean | $\pm$ SD | T 0.5<br>mean | $\pm$ SD | T 1.0<br>mean | $\pm$ SD | T 4.0<br>mean | $\pm$ SD | T 24.0<br>mean | $\pm$ SD | T 48.0<br>mean | $\pm$ SD | T 72.0<br>mean | $\pm$ SD | T 96.0<br>mean | $\pm$ SD |
|----------------------------|---------------|----------|---------------|----------|---------------|----------|---------------|----------|----------------|----------|----------------|----------|----------------|----------|----------------|----------|
| $\alpha$ -thujene          | 0.00          | 0.00     | 0.00          | 0.00     | 0.00          | 0.00     | 0.00          | 0.00     | 674.60         | 39.26    | 741.60         | 114.77   | 1960.00        | 374.90   | 1524.25        | 28.34    |
| $\alpha$ -phellandrene     | 0.00          | 0.00     | 0.00          | 0.00     | 0.00          | 0.00     | 1042.60       | 42.31    | 3046.60        | 1250.47  | 4465.00        | 267.55   | 8541.50        | 141.53   | 7699.75        | 245.10   |
| $\alpha$ -pinene           | 0.00          | 0.00     | 0.00          | 0.00     | 758.20        | 250.08   | 4205.40       | 1741.42  | 13731.00       | 681.45   | 19008.80       | 932.41   | 24645.25       | 272.48   | 23613.25       | 315.81   |
| camphene                   | 0.00          | 0.00     | 0.00          | 0.00     | 467.20        | 413.05   | 2531.60       | 341.35   | 8129.60        | 634.65   | 10884.60       | 1872.30  | 12760.50       | 868.97   | 11618.75       | 329.13   |
| $\beta$ -phellandrene      | 0.00          | 0.00     | 0.00          | 0.00     | 0.00          | 0.00     | 0.00          | 0.00     | 1253.00        | 182.82   | 1636.60        | 310.19   | 1777.75        | 351.32   | 1397.75        | 57.41    |
| $\beta$ -pinene            | 0.00          | 0.00     | 0.00          | 0.00     | 0.00          | 0.00     | 695.80        | 99.25    | 1647.60        | 341.77   | 2340.80        | 262.71   | 2852.50        | 157.47   | 2267.00        | 163.58   |
| $\beta$ -myrcene           | 0.00          | 0.00     | 0.00          | 0.00     | 0.00          | 0.00     | 0.00          | 0.00     | 12784.72       | 1887.73  | 14664.69       | 424.21   | 13423.85       | 319.58   | 12401.00       | 374.98   |
| 3-carene                   | 0.00          | 0.00     | 0.00          | 0.00     | 0.00          | 0.00     | 1733.60       | 130.99   | 5116.60        | 630.51   | 6950.60        | 345.62   | 6909.00        | 34.42    | 4888.50        | 583.89   |
| o-cymene                   | 0.00          | 0.00     | 0.00          | 0.00     | 0.00          | 0.00     | 0.00          | 0.00     | 240.00         | 103.85   | 420.40         | 102.78   | 15245.25       | 657.87   | 11521.75       | 378.94   |
| d-limonene                 | 0.00          | 0.00     | 0.00          | 0.00     | 0.00          | 0.00     | 0.00          | 0.00     | 280.80         | 84.36    | 1195.60        | 144.72   | 3871.25        | 559.45   | 1439.25        | 86.90    |
| eucalyptol                 | 544.00        | 756.18   | 2253.40       | 685.27   | 5643.60       | 427.10   | 4761.40       | 133.63   | 10550.40       | 422.52   | 11671.80       | 223.26   | 7302.25        | 306.85   | 5888.50        | 46.34    |
| trans- $\beta$ -ocimene    | 0.00          | 0.00     | 0.00          | 0.00     | 0.00          | 0.00     | 1527.80       | 326.38   | 5231.60        | 327.56   | 5245.40        | 670.09   | 6435.25        | 47.38    | 227.50         | 43.93    |
| $\beta$ -ocimene           | 0.00          | 0.00     | 0.00          | 0.00     | 0.00          | 0.00     | 0.00          | 0.00     | 450.40         | 109.98   | 681.60         | 279.46   | 402.75         | 17.00    | 403.00         | 57.58    |
| linalool                   | 0.00          | 0.00     | 0.00          | 0.00     | 0.00          | 0.00     | 0.00          | 0.00     | 0.00           | 0.00     | 0.00           | 0.00     | 6095.50        | 77.98    | 4111.00        | 94.87    |
| (+)-camphor                | 0.00          | 0.00     | 0.00          | 0.00     | 875.00        | 244.66   | 956.80        | 433.49   | 3137.99        | 259.93   | 6296.34        | 517.68   | 6072.60        | 420.12   | 4832.05        | 431.97   |
| (-)-4-terpineol            | 0.00          | 0.00     | 0.00          | 0.00     | 0.00          | 0.00     | 0.00          | 0.00     | 0.00           | 0.00     | 0.00           | 0.00     | 2648.00        | 15.45    | 1930.25        | 12.89    |
| linalyl acetate            | 0.00          | 0.00     | 0.00          | 0.00     | 0.00          | 0.00     | 0.00          | 0.00     | 0.00           | 0.00     | 0.00           | 0.00     | 5127.50        | 27.77    | 6217.50        | 47.05    |
| (z,z)- $\alpha$ -farnesene | 0.00          | 0.00     | 775.00        | 448.72   | 776.60        | 301.44   | 390.00        | 67.99    | 323.40         | 54.67    | 168.80         | 40.71    | 0.00           | 0.00     | 0.00           | 0.00     |



**Table S8. 4** Volatile headspace compounds (mean peak area  $\pm$  SD) of *Lavandula angustifolia* extracted by headspace and analyzed by GCMS at various incubation times of 0.0, 0.5, 1.0, 4.0, 24.0, 48.0, 72.0, and 96.0 hours for N9 samples.

| Compounds              | T 0.0<br>mean | $\pm$ SD | T 0.5<br>mean | $\pm$ SD | T 1.0<br>mean | $\pm$ SD | T 4.0<br>mean | $\pm$ SD | T 24.0<br>mean | $\pm$ SD | T 48.0<br>mean | $\pm$ SD | T 72.0<br>mean | $\pm$ SD | T 96.0<br>mean | $\pm$ SD |
|------------------------|---------------|----------|---------------|----------|---------------|----------|---------------|----------|----------------|----------|----------------|----------|----------------|----------|----------------|----------|
| $\alpha$ -phellandrene | 401.60        | 82.40    | 512.00        | 92.04    | 529.40        | 65.11    | 686.00        | 180.20   | 710.8          | 75.69    | 711.80         | 116.40   | 750.20         | 92.49    | 796.60         | 68.04    |
| $\alpha$ -pinene       | 1682.40       | 125.80   | 2310.40       | 152.73   | 2397.40       | 225.08   | 2606.20       | 141.56   | 2833           | 402.40   | 2990.20        | 320.94   | 3702.40        | 297.34   | 3606.80        | 357.39   |
| camphene               | 569.00        | 134.86   | 663.60        | 117.62   | 880.20        | 232.12   | 1101.00       | 90.17    | 1092.2         | 84.86    | 1200.20        | 177.67   | 1388.80        | 65.03    | 1521.40        | 96.73    |
| eucalyptol             | 229.40        | 49.60    | 298.40        | 116.98   | 643.40        | 188.31   | 691.40        | 159.03   | 698.4          | 107.40   | 766.00         | 100.57   | 812.60         | 126.19   | 775.20         | 193.98   |

**Table S9.** Emulsifier families, types, chemical names, and hydrophilic-lipophilic balance (HLB) value

|     | Emulsifier family | Type | Chemical name                              | HLB  |
|-----|-------------------|------|--------------------------------------------|------|
| (A) | Span              | 80   | Sorbitan monooleate                        | 4.3  |
| (B) | Tween             | 20   | Polyoxyethylene (20) sorbitan monolaurate  | 16.7 |
| (C) | Span              | 20   | Sorbitan monolaurate                       | 8.6  |
| (D) | PEG-200           | N/A  | Polyethylene glycol 200                    | 8.2  |
| (E) | Triton X 100      | N/A  | Polyethylene Glycol-p-isooctylphenyl Ether | 13.5 |

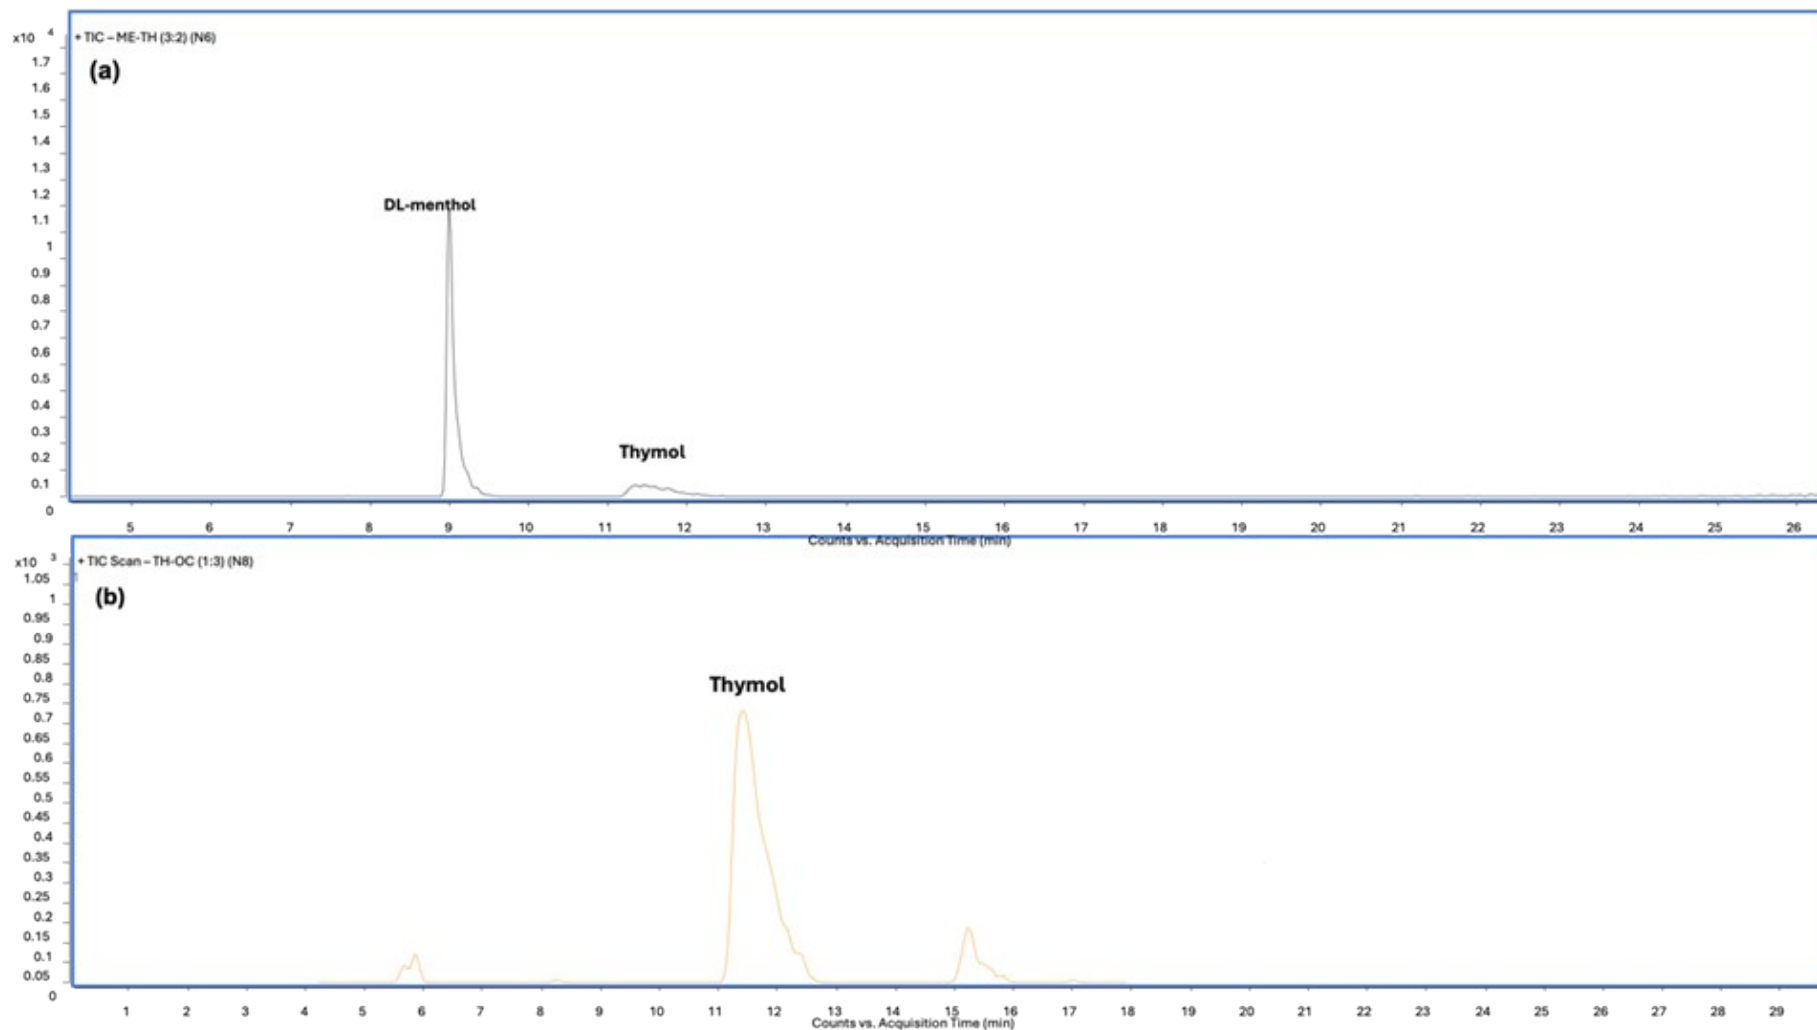

**Figure S1.** Total ion chromatograms for the volatile compounds of the two hydrophobic NADES: (a) Menthol-Thymol (3:2) (N6), (b) Thymol-Octanoic Acid (1:3) (N8)

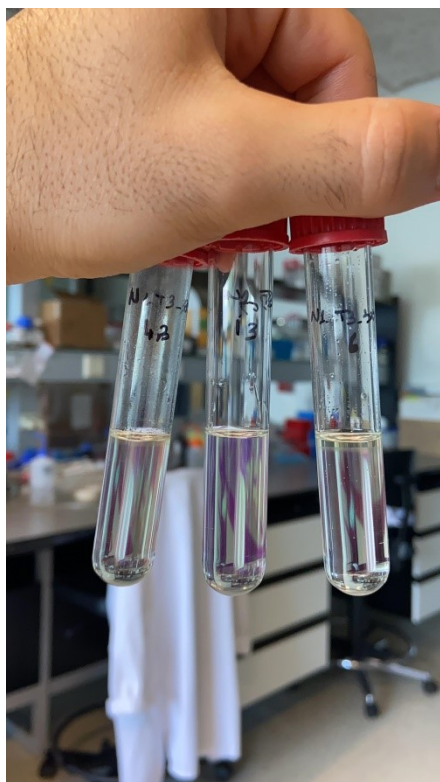

**a**

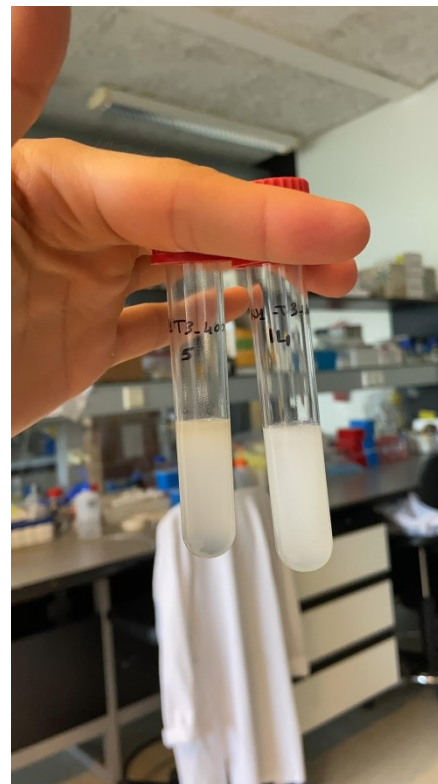

**b**

**Figure S2.** Example of N1 phase separation; **a)** Clear formulation with different phase separations (60, 30, 90%, from left to right); **b)** Example of not clear formulation with phase separation.

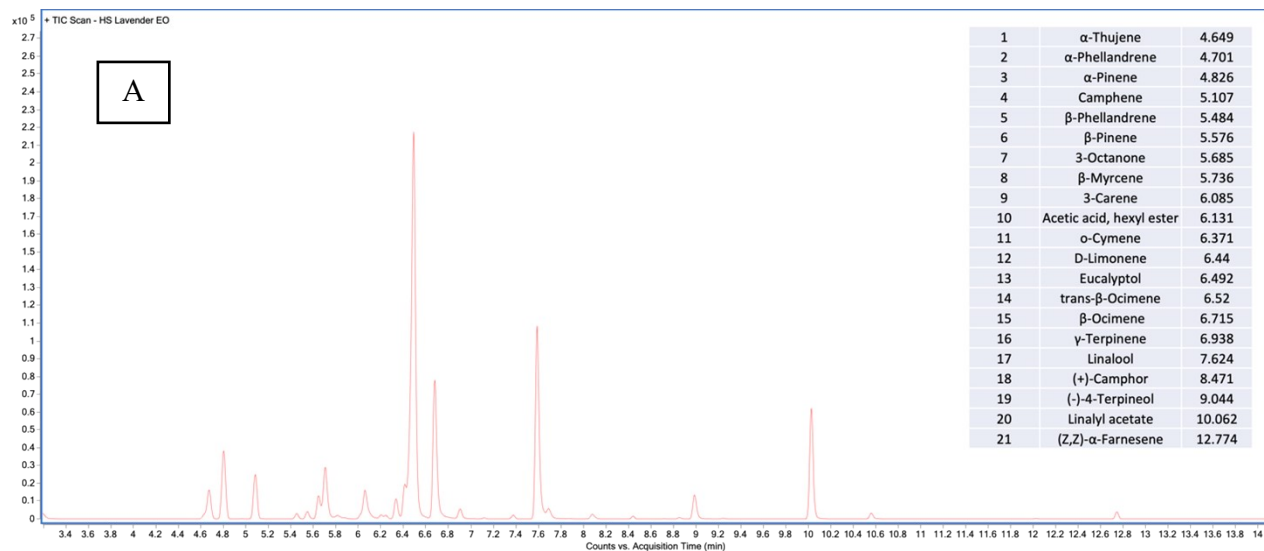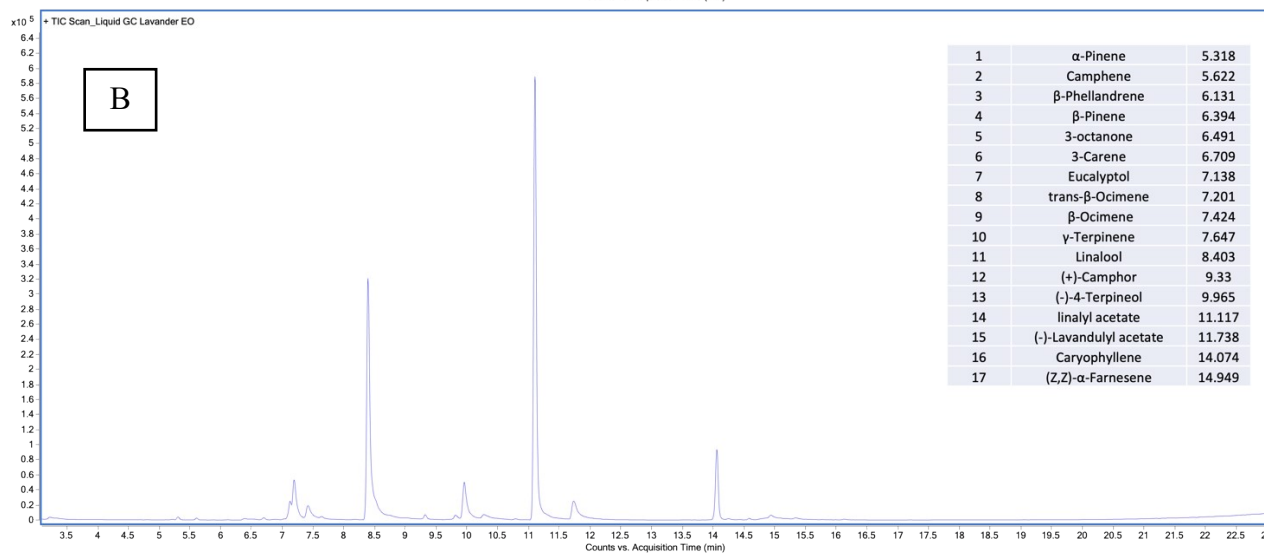

**Figure S3.** *Lavandula angustifolia* essential oil (LEO) Total Ion Chromatograms (TIC) profile showing: (A) Headspace GC/MS injection with a total of 21 identified peaks (used as control (C) in this study), and (B) Liquid GC/MS injection with a total of 17 identified compounds
